# Supplementary material for: Electrochemical and atomic force microscopy investigations of the effect of CdS on the local electrical properties of CH3NH3PbI3:CdS perovskite solar cells
Source: Royal Society of Chemistry journal article supplement (doi:10.1039/c7tc04377e), 2017-01-01
Supplement: c7tc04377e1.pdf [file c7tc04377e1.pdf]

## Supplementary information

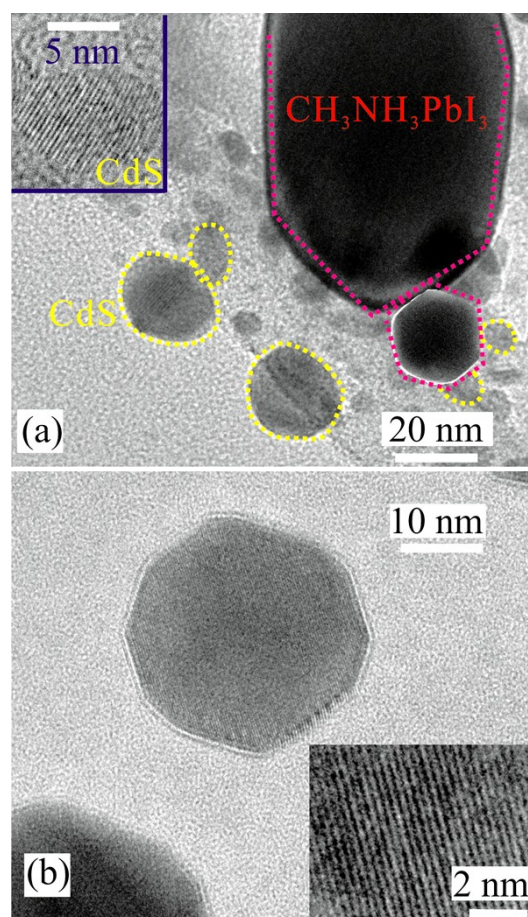

Figure 4

**Figure S1.** (a) The TEM image of  $\text{CH}_3\text{NH}_3\text{PbI}_3:\text{CdS}$  (0.1) composite film and the inset is the HR-TEM image of one single  $\text{CdS}$  nanoparticle. (b) The HR-TEM image of one single  $\text{CH}_3\text{NH}_3\text{PbI}_3$  particle.
